# Supplementary material for: Neuronal Differentiation-Related Epigenetic Regulator ZRF1 Has Independent Prognostic Value in Neuroblastoma but Is Functionally Dispensable In Vitro
Source: MDPI journal article supplement (doi:10.3390/cancers13194845), 2021-09-28
Supplement: s1 [file s1]

Article

# Neuronal Differentiation-Related Epigenetic Regulator *ZRF1* Has Independent Prognostic Value in Neuroblastoma but Is Functionally Dispensable In Vitro

Carlos Jiménez <sup>1</sup>, Roberta Antonelli <sup>1</sup>, Marc Masanas <sup>1</sup>, Aroa Soriano <sup>1</sup>, Laura Devis-Jauregui <sup>2,3</sup>, Jessica Camacho <sup>4</sup>, Ainara Magdaleno <sup>1</sup>, Gabriela Guillén <sup>1,5</sup>, Raquel Hladun <sup>1,6</sup>, Luz Jubierre <sup>1</sup>, Josep Roma <sup>1</sup>, David Llobet-Navas <sup>2,3</sup>, Josep Sánchez de Toledo <sup>1,7</sup>, Lucas Moreno <sup>1,6</sup>, Soledad Gallego <sup>1,6</sup> and Miguel F. Segura <sup>1,\*</sup>

## Supplementary

**Citation:** Jiménez, C.; Antonelli, R.; Masanas, M.; Soriano, A.; Devis-Jauregui, L.; Camacho, J.; Magdaleno, A.; Guillén, G.; Hladun, R.; Jubierre, L.; et al. Neuronal Differentiation-Related Epigenetic Regulator *ZRF1* Has Independent Prognostic Value in Neuroblastoma but Is Functionally Dispensable In Vitro. *Cancers* **2021**, *13*, 4845. <https://doi.org/10.3390/cancers13194845>

Academic Editors: Luis Franco and Rakesh K. Singh

Received: 26 August 2021

Accepted: 25 September 2021

Published: 28 September 2021

**Publisher's Note:** MDPI stays neutral with regard to jurisdictional claims in published maps and institutional affiliations.

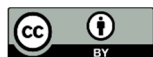

**Copyright:** © 2021 by the authors. Licensee MDPI, Basel, Switzerland. This article is an open access article distributed under the terms and conditions of the Creative Commons Attribution (CC BY) license (<https://creativecommons.org/licenses/by/4.0/>).

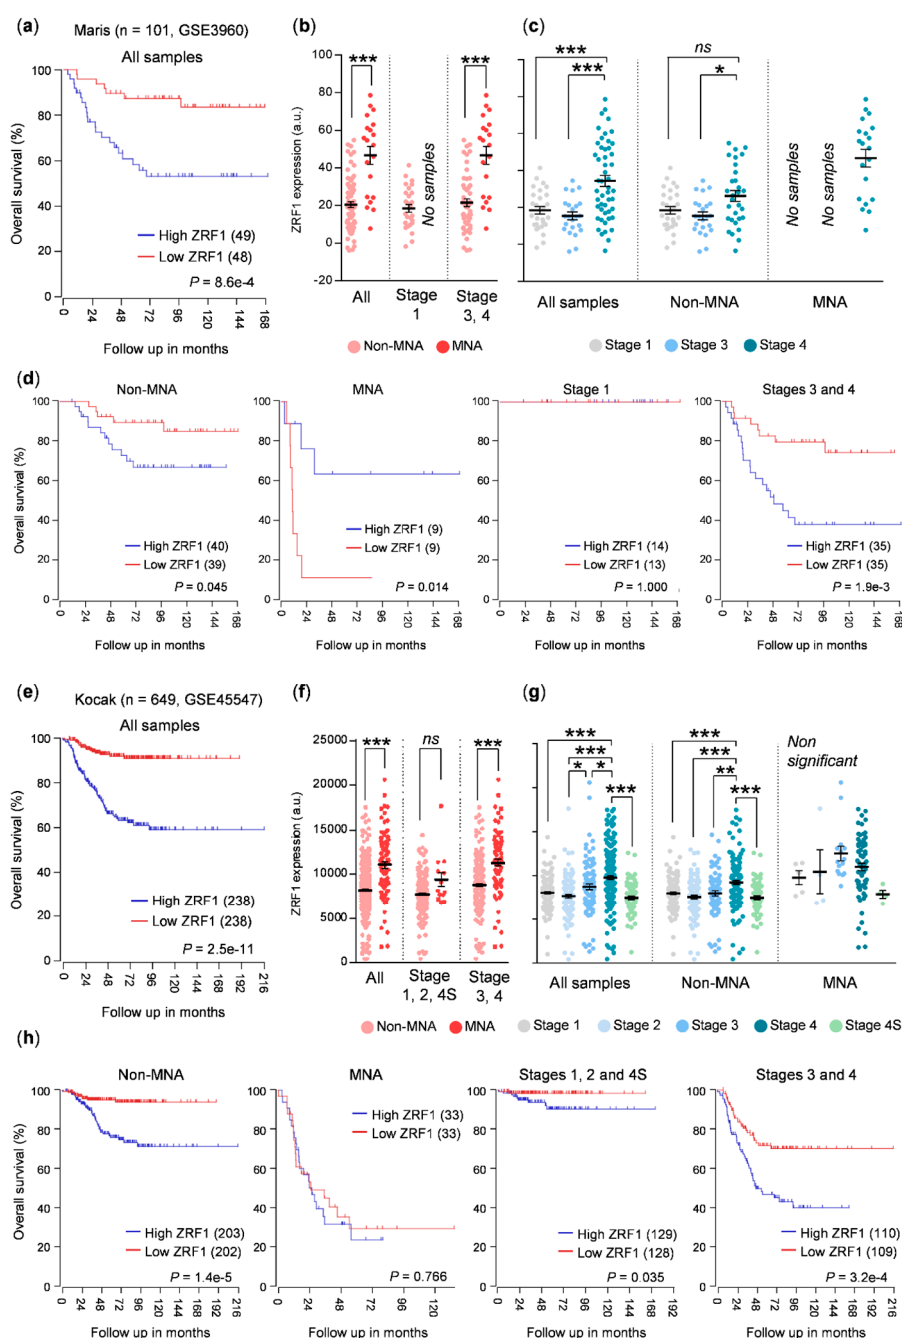

**Figure S1.** ZRF1 is associated to poor prognosis in neuroblastoma. (a) Kaplan-Meier survival plot of a cohort of 101 patients (GSE3960) split in high (above median) and low (below median) ZRF1 mRNA expression. (b) ZRF1 mRNA levels in MYCN-amplified tumors (MNA, dark red) vs non-MYCN amplified tumors (non-MNA, light red) according to the indicated disease stages. (c) ZRF1 mRNA levels according to disease stage in the whole cohort (left) or considering patients with non-MNA (middle) or with MNA tumors (right). (d) Kaplan-Meier survival plots comparing samples with high (above median) and low (below median) ZRF1 levels in the indicated groups of patients. (e) Kaplan-Meier survival plot of a cohort of 649 patients (GSE45547) split in high (above median) and low (below median) ZRF1 mRNA expression. (f) ZRF1 mRNA levels in MYCN-amplified tumors (MNA, dark red) vs non-MYCN amplified tumors (non-MNA, light red) according to the indicated disease stages. (g) ZRF1 mRNA levels according to disease stage in the whole cohort (left) or considering patients with non-MNA (middle) or with MNA tumors (right). (h) Kaplan-Meier survival plots comparing samples with high (above median) and low (below median) ZRF1 levels in the indicated groups of patients. *ns* means 'non-significant'; \* means  $P < 0.05$ ; \*\* means  $P < 0.01$ ; \*\*\* means  $P < 0.001$ .

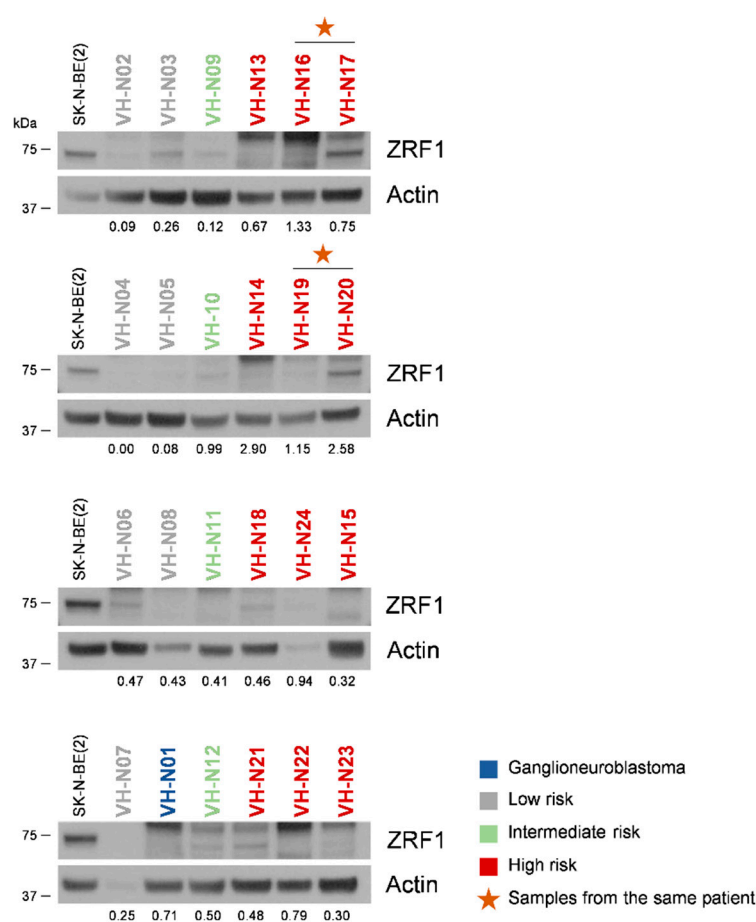

**Figure S2.** ZRF1 protein levels western blot analysis in patient tumor samples. Protein homogenates from a cohort of 22 neuroblastoma patients were analyzed by western blot. Actin was used as loading control. Actin-normalized ZRF1 relative levels are shown underneath, expressed as Fold Change vs SK-N-BE(2) cell line. Stars indicate samples of the same patient.

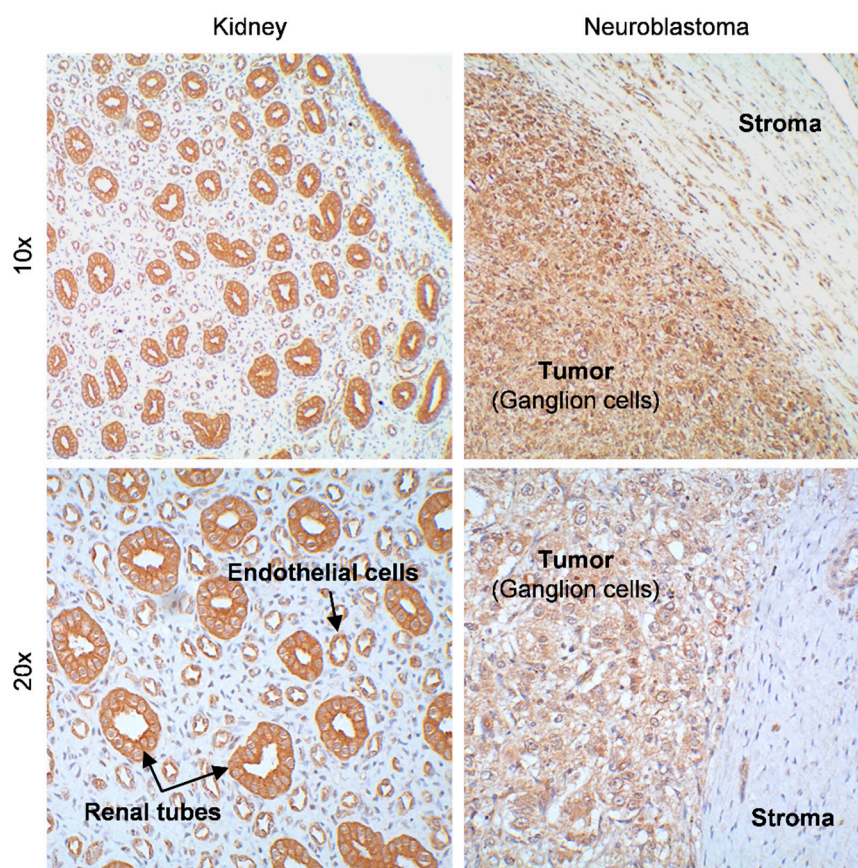

Figure S3. ZRF1 protein is detected by immunohistochemistry (IHC) in the tumor cells of a neuroblastoma formalin-fixed paraffin-embedded human sample. A kidney sample was used as control for specific staining (positive for renal tubules and endothelial cells, negative for fibroblasts).

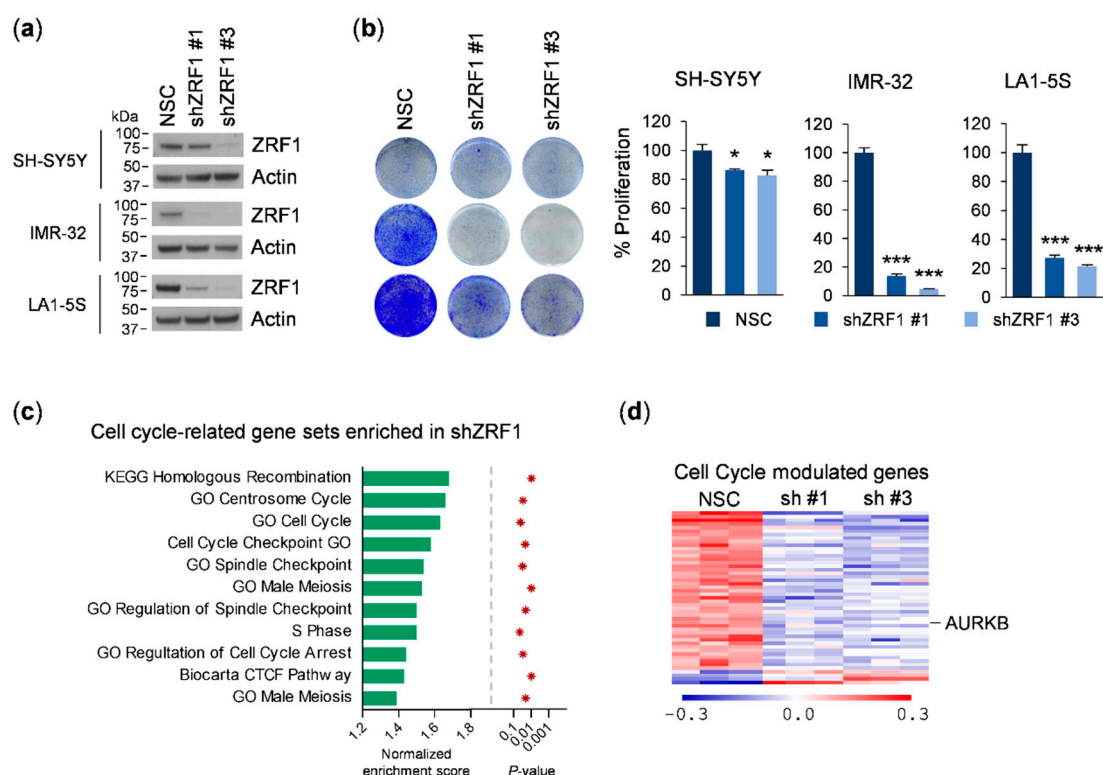

Figure S4. Functional and molecular consequences of shRNA-mediated depletion of ZRF1 in neuroblastoma cells. (a) ZRF1 protein levels upon shZRF1 #1 and #3 transduction in the indicated neuroblastoma cell lines. (b) Cell proliferation assay in neuroblastoma cell lines infected with NSC and shZRF1 for 96h. (c) Gene expression microarray data of SK-N-BE(2) cells transduced with NSC or shZRF1 #1 and #3, at 72h post-infection. Differential gene expression was analyzed by Gene Set Enrichment Analysis (GSEA). Normalized enrichment score and *P*-value of cell cycle-related gene sets from KEGG, GO, Biocarta and MSigDB Hallmarks are shown. (d) Heatmap showing expression levels of genes corresponding to cell cycle-related gene sets, including AURKB, in shZRF1 transduced SK-N-BE(2) cells. \* means  $P < 0.05$ ; \*\*\* means  $P < 0.001$ .

Figure S5

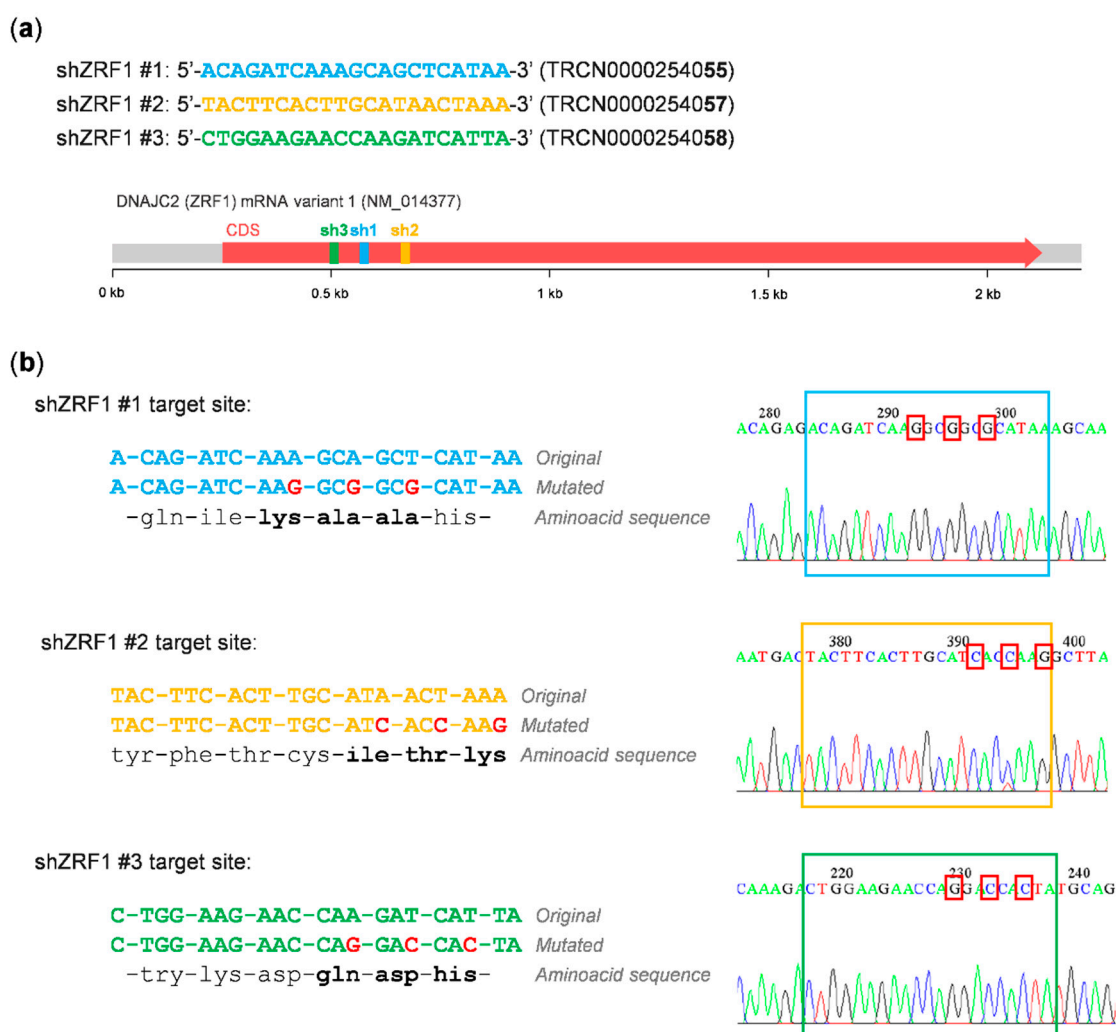

**Figure S5.** Design of a triple shRNA insensitive ZRF1 overexpression construct. (a) Target sequences of the three shRNAs used in this study and their position in ZRF1 (*DNAJC2*) mRNA. (b) Left, design of three silent mutations on each target sequence, generated by site-directed mutagenesis. Right, Sanger electropherogram validating the correct incorporation of these mutations into pCAG-ZRF1 cDNA vector.



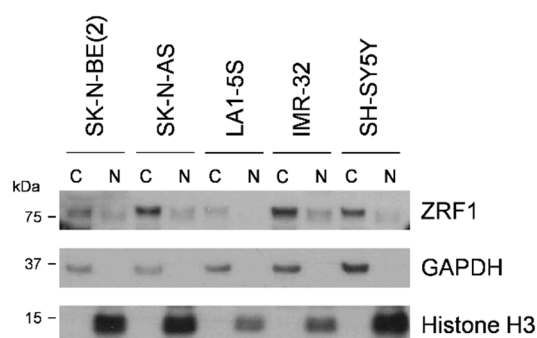

**Figure S6.** Subcellular localization analysis of ZRF1 by western blot in a panel of neuroblastoma cell lines. Nuclei were isolated from cytoplasmic (C) fraction by lysing cells in a hypotonic buffer and subjected to 50 strokes with a Potter Elvehjem homogenizer. Nuclear fraction (N) was extracted by pelleting and lysing the nuclei with RIPA buffer. GAPDH and histone H3 were used as cytoplasmic and nuclear markers, respectively.

**Figure 3A**

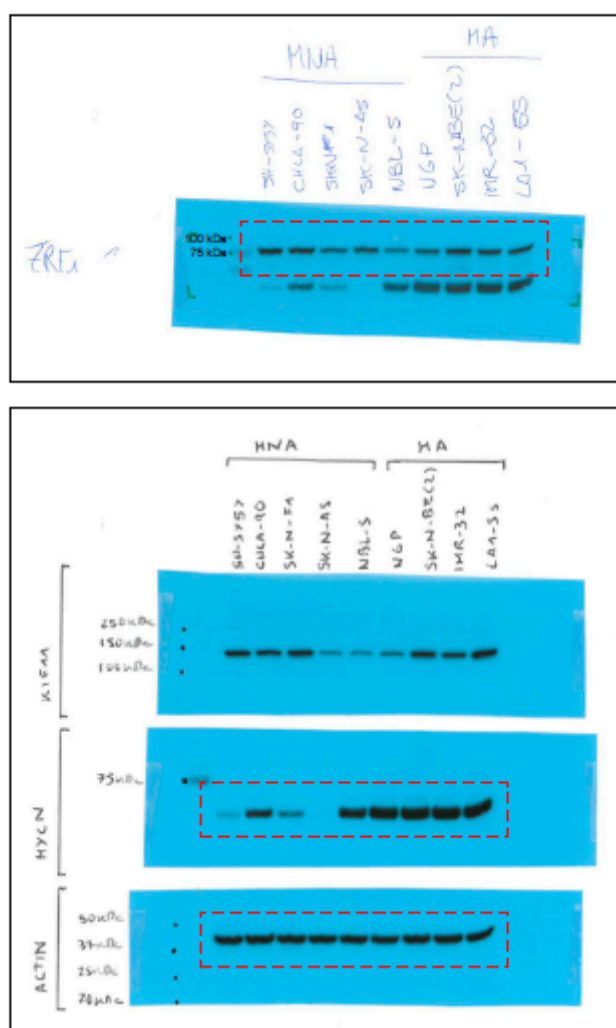

Figure 3B

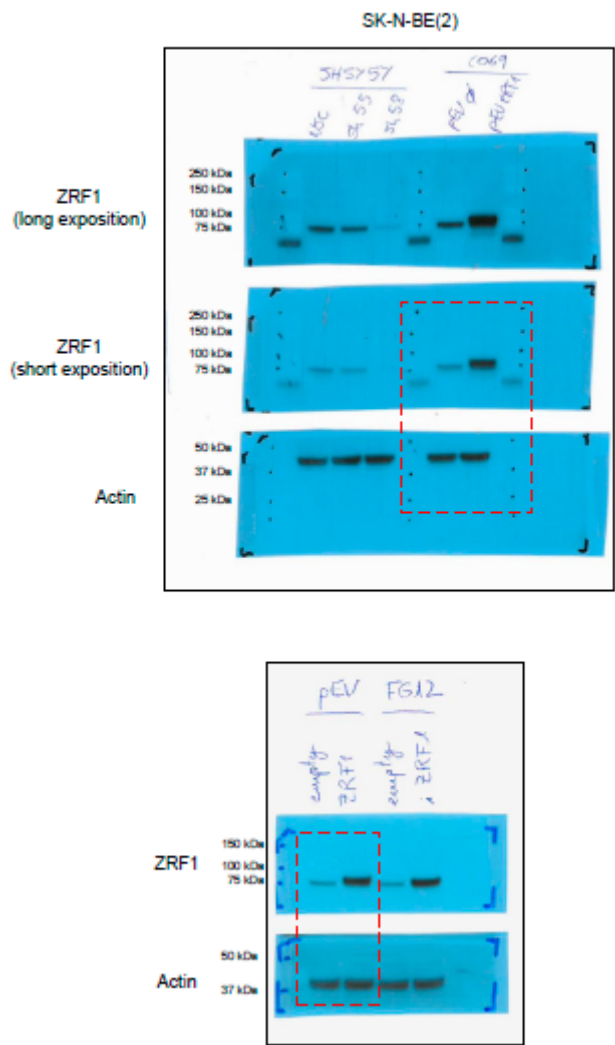

Figure 4A

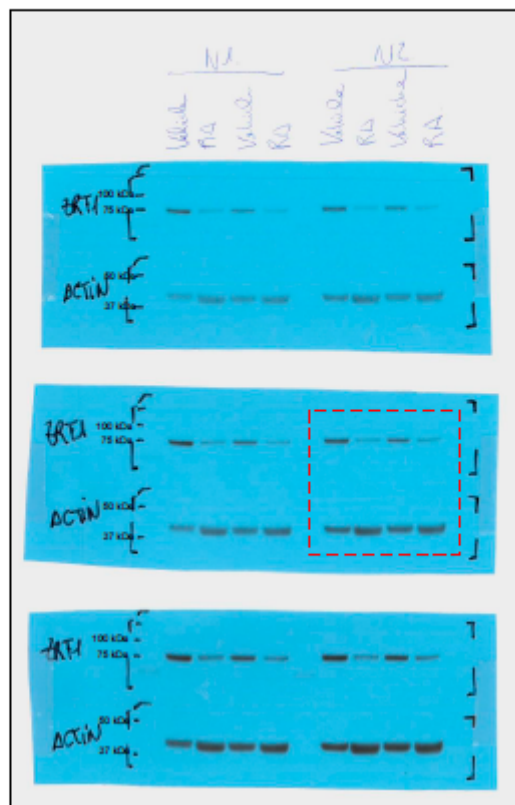

Figure 5A

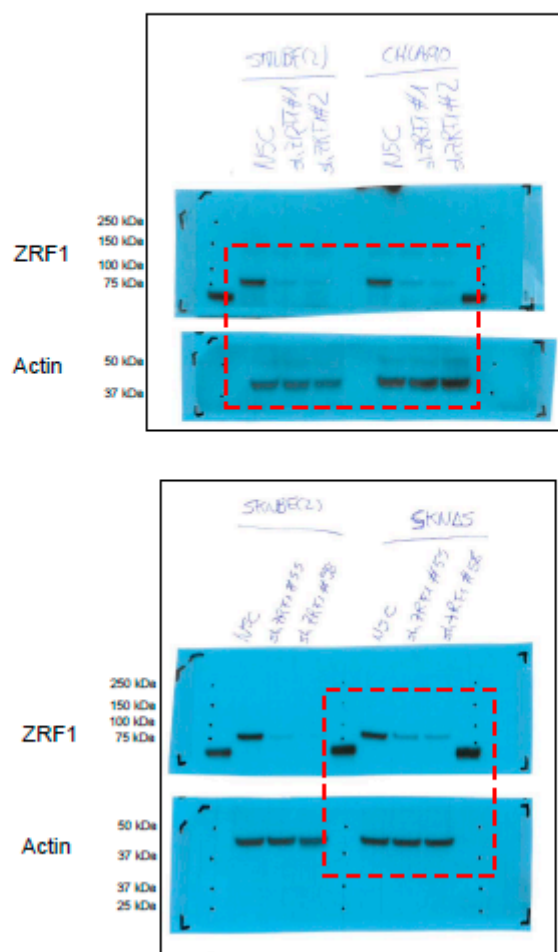



Figure 5C

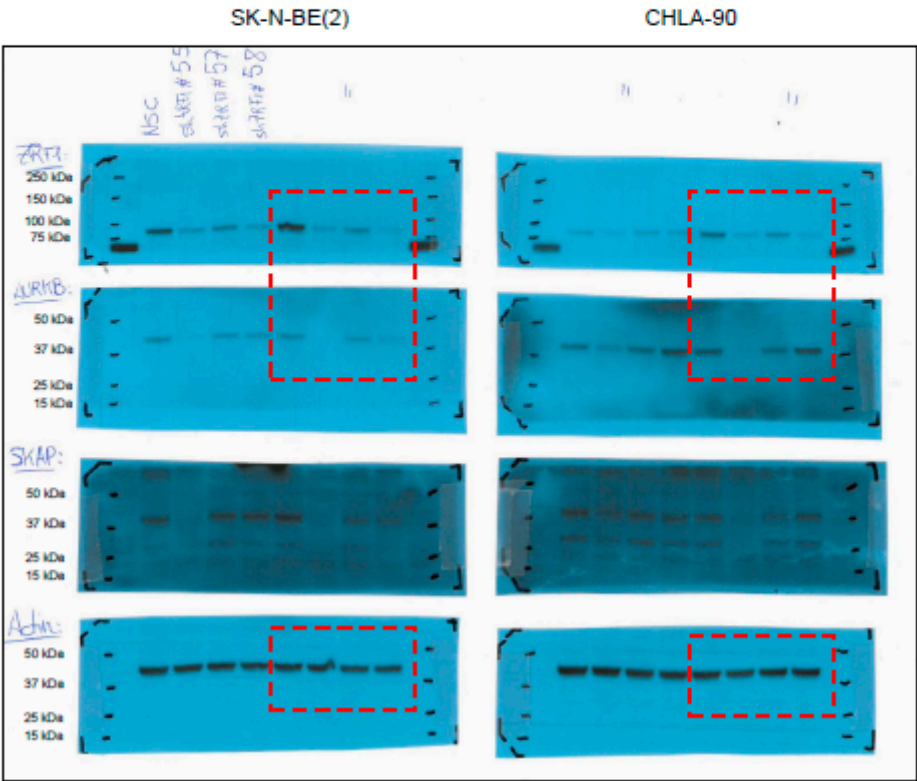

Figure 5E

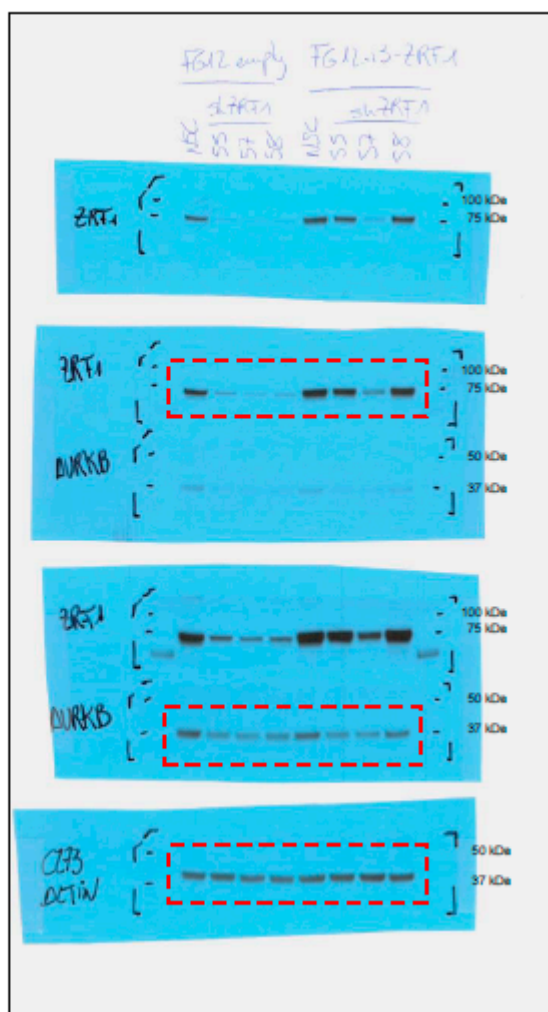

Figure 6A

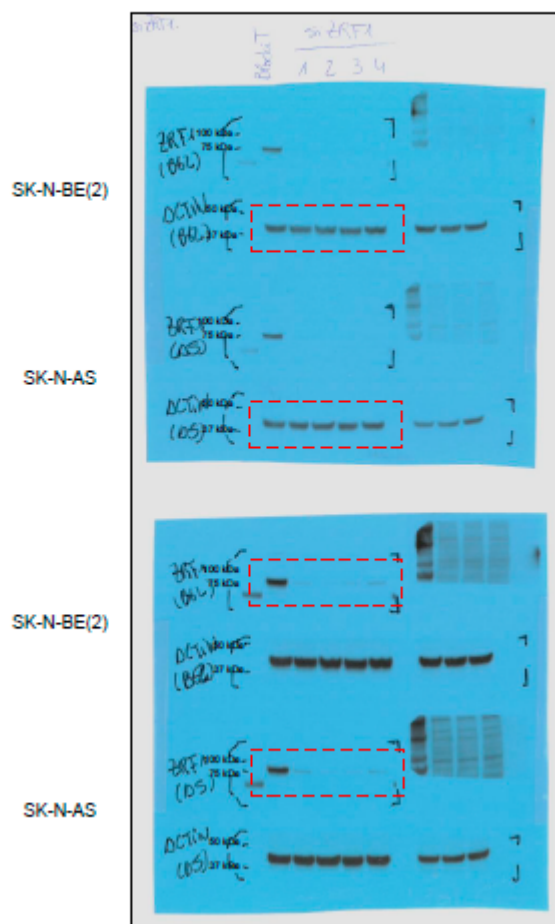

Figure S2A

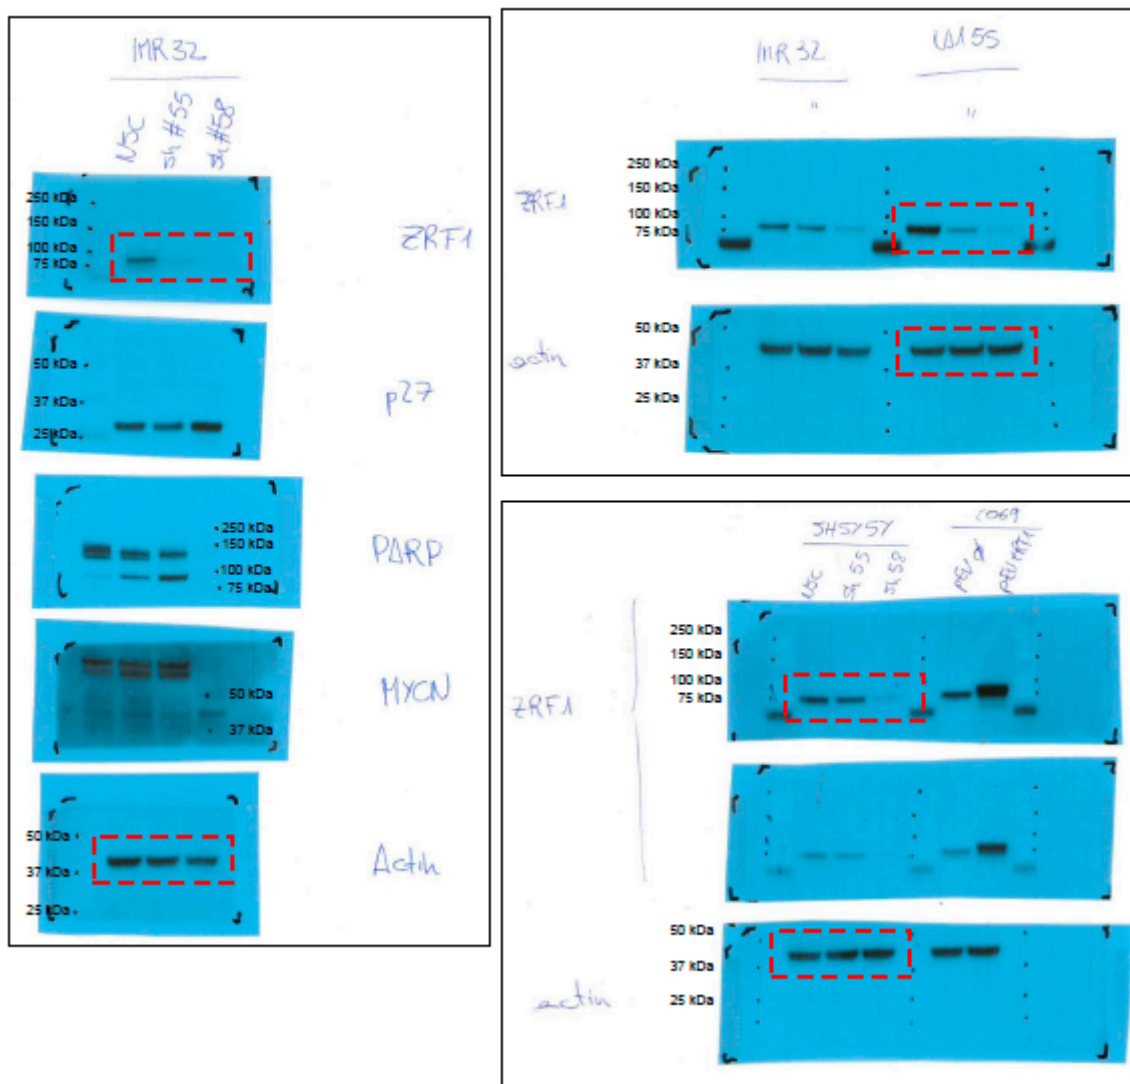

Figure S4

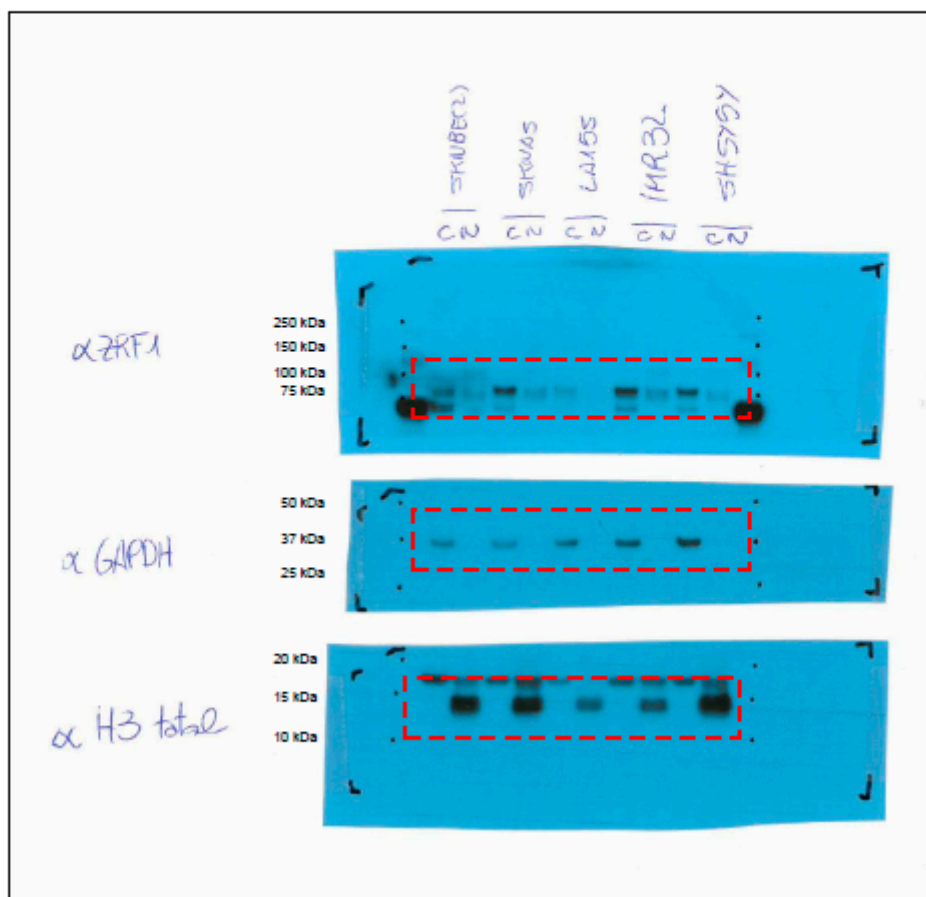

Figure S7. Original Western Blot image of Figure 3A, B, Future 4A, Figure 5A,C,E, Figure 6A, Figure S2A and Figure S4.

Table S1. Antibodies used for western blot analyses.

| Protein                     | Origin | Dilution          | Company                     | Reference    |
|-----------------------------|--------|-------------------|-----------------------------|--------------|
| <i>Primary antibodies</i>   |        |                   |                             |              |
| ZRF1                        | Rabbit | 1:1000 in 5% milk | Provided by Luciano DiCroce |              |
| MYCN                        | Mouse  | 1:2000 in 5% BSA  | Santa Cruz Biotechnology    | sc-53993     |
| AURKB                       | Mouse  | 1:1000 in 5% BSA  | BD Biosciences              | #611083      |
| β-actin                     | Mouse  | 1:10000 in 5% BSA | Santa Cruz Biotechnology    | sc-47778 HRP |
| <i>Secondary antibodies</i> |        |                   |                             |              |
| α-rabbit IgG-peroxidase     |        | 1:10000           | Sigma-Aldrich               | #A0545       |
| α-mouse IgG-peroxidase      |        | 1:10000           | Sigma-Aldrich               | #A9044       |

BSA: Bovine Serum Albumin; HRP: Horseradich Peroxidase. Headquarters: Santa Cruz Biotechnology, Dallas, TX, USA; BD Biosciences, San Jose, CA, USA; Sigma-Aldrich, St. Louis, MO, USA.

Table S2. Oligonucleotides used for silent ZRF1 mutagenesis and RARB RT-qPCR.

| Name           | Sequence                                 |
|----------------|------------------------------------------|
| <i>Primers</i> |                                          |
| ZRF1mut1_Fw    | GCTACACAGAGACAGATCAAGGCGGCGCATAAAGCAATGG |

|             |                                           |
|-------------|-------------------------------------------|
| ZRF1mut1_Rv | CCATTGCTTTATGCGCCGCTTGATCTGTCTCTGTGTAGC   |
| ZRF1mut2_Fw | CTTGATCATACCAAGGCTTATGAAATGTTATCTGATCCAG  |
| ZRF1mut2_Rv | CATAAGCCTTGGTGATGCAAGTGAAGTAGTCATTATCTCC  |
| ZRF1mut3_Fw | CCCAAAGACTGGAAGAACCAGGACCACTATGCAGTTCTTGG |
| ZRF1mut3_Rv | CCAAGAAGTGCATAGTGGTCTGCTTCTTCCAGTCTTTGGG  |
| ZRF1mut_seq | ATGCTGCTTCTGCCAAGC                        |
| RARB_Fw     | TCCGAAAAGCTCACCAGGAAA                     |
| RARB_Rv     | GGCCAGTTCACTGAATTTGTCC                    |
| L27_Fw      | AGCTGTCATCGTGAAGAA                        |
| L27_Rv      | CTTGCGATCTTCTTCTTGCC                      |

**Table S3.** ZRF1 targeting sequences.

| <i>shRNA</i>               |                       |
|----------------------------|-----------------------|
| shZRF1 #1 (TRCN0000254055) | ACAGATCAAAGCAGCTCATAA |
| shZRF1 #2 (TRCN0000254057) | TACTTCACCTGCATAACTAAA |
| shZRF1 #3 (TRCN0000254058) | CTGGAAGAACCAAGATCATTA |
| <i>siRNA</i>               |                       |
| siZRF1 #1                  | GAUCAAAGCAGCUCAUAAA   |
| siZRF1 #2                  | GAACUUGUCGAGAUGGUAA   |
| siZRF1 #3                  | CGACAAGCAUCUAAGAACA   |
| siZRF1 #4                  | GUUAUCUGAUCCAGUGAAA   |

**Table S4.** Cut-off value for ZRF1 levels analysis, based on the ability for overall survival prediction (using GSE62564,  $n = 498$ ).

| Cut-off Point                                                     | Value   | Sensibility/ Specificity |
|-------------------------------------------------------------------|---------|--------------------------|
| Median ( $d = 0.368$ )                                            | 20.5625 | (0.790;0.578)            |
| AUC OS (Youden Index $d = 0.4450$ )                               | 24.2395 | (0.610; 0.835)           |
| <b>OS ROC curve: AUC = 0.765; <math>P</math>-value &lt; 0.001</b> |         |                          |
| AUC: area under the curve; OS: Overall Survival                   |         |                          |

**Table S5.** ZRF1 mRNA expression correlations with clinical variables in neuroblastoma using Fisher's test (GSE62564,  $n = 498$ ).

| Variable          | $\Sigma$ | ZRF1        |             | P value |
|-------------------|----------|-------------|-------------|---------|
|                   |          | Low         | High        |         |
| All patients      | 498      | 369 (74.1%) | 129 (25.9%) |         |
| <b>Sex</b>        |          |             |             |         |
| M                 | 287      | 211 (73.5%) | 76 (26.5%)  | 0.757   |
| F                 | 211      | 158 (74.9%) | 53 (25.1%)  |         |
| <b>Age</b>        |          |             |             |         |
| <18 months        | 300      | 264 (88.0%) | 36 (12.0%)  | 0.000   |
| ≥18 months        | 198      | 105 (53.0%) | 93 (47.0%)  |         |
| <b>INSS Stage</b> |          |             |             |         |
| 1                 | 121      | 116 (95.9%) | 5 (4.1%)    | 0.000   |
| 2                 | 78       | 68 (87.2%)  | 10 (12.8%)  |         |
| 3                 | 63       | 41 (65.1%)  | 22 (34.9%)  |         |
| 4                 | 183      | 93 (50.8%)  | 90 (49.2%)  |         |
| 4s                | 53       | 51 (96.2%)  | 2 (3.8%)    |         |
| <b>ISSN Stage</b> |          |             |             |         |
| 1,2,3 & 4s        | 315      | 276 (87.6%) | 39 (12.4%)  | 0.000   |
| 4                 | 183      | 93 (50.8%)  | 90 (49.2%)  |         |
| <b>MYCN</b>       |          |             |             |         |
| No amp            | 401      | 332 (82.8%) | 69 (17.2%)  | 0.000   |
| Amp               | 92       | 33 (35.9%)  | 59 (64.1%)  |         |
| <b>Risk</b>       |          |             |             |         |
| Low, Intermediate | 322      | 291 (90.4%) | 31 (9.6%)   | 0.000   |



|             |     |             |            |       |
|-------------|-----|-------------|------------|-------|
| High        | 176 | 78 (44.3%)  | 98 (55.7%) |       |
| <b>OS</b>   |     |             |            |       |
| No          | 393 | 328 (83.5%) | 65 (16.5%) | 0.000 |
| Yes         | 105 | 41 (39.0%)  | 64 (61.0%) |       |
| <b>EFS</b>  |     |             |            |       |
| No          | 315 | 268 (85.1%) | 47 (14.9%) | 0.000 |
| Yes         | 183 | 101 (55.2%) | 82 (44.8%) |       |
| <b>FAV</b>  |     |             |            |       |
| Favorable   | 181 | 175 (96.7%) | 6 (3.3%)   | 0.000 |
| Unfavorable | 91  | 39 (42.9%)  | 52 (57.1%) |       |

EFS: Event-free survival; FAV: Unfavorable/Favorable (class label for extreme disease course); HR: High-risk patients; OS: Overall survival.

**Table S6.** Neuroblastoma tumor samples clinical data.

| Sample | Patient | Age     | Risk Group            | MYCN Amplification | Clinical Situation at Sample Collection   | Treatment sStatus |
|--------|---------|---------|-----------------------|--------------------|-------------------------------------------|-------------------|
| VH-N01 | VH-P01  | 5 y     | Ganglio-neuroblastoma | NA                 | Resection at diagnose                     | Pre-treatment     |
| VH-N02 | VH-P02  | 9 m     | Low                   | Unknown            | Resection at diagnose                     | Pre-treatment     |
| VH-N03 | VH-P03  | 1 m     | Low                   | Unknown            | Resection at diagnose                     | Pre-treatment     |
| VH-N04 | VH-P04  | 1 y 8 m | Low                   | Unknown            | Primary tumor resection                   | Post-treatment    |
| VH-N05 | VH-P05  | 11 m    | Low                   | NA                 | Resection at diagnose                     | Pre-treatment     |
| VH-N06 | VH-P06  | 1 y 2 m | Low                   | NA                 | Resection at diagnose                     | Pre-treatment     |
| VH-N07 | VH-P07  | 1 m     | Low                   | NA                 | Biopsy at diagnose                        | Pre-treatment     |
| VH-N08 | VH-P08  | 16 m    | Low                   | Unknown            | Primary tumor resection                   | Post-treatment    |
| VH-N09 | VH-P09  | 2 y     | Intermediate          | NA                 | Biopsy at diagnose                        | Pre-treatment     |
| VH-N10 | VH-P10  | 1 y 9 m | Intermediate          | NA                 | Biopsy at diagnose                        | Pre-treatment     |
| VH-N11 | VH-P11  | 2 y     | Intermediate          | NA                 | Primary tumor resection                   | Post-treatment    |
| VH-N12 | VH-P12  | 2 y     | Intermediate          | NA                 | Primary tumor resection                   | Post-treatment    |
| VH-N13 | VH-P13  | 4 y     | High                  | NA                 | Primary tumor resection                   | Post-treatment    |
| VH-N14 | VH-P14  | 7 y     | High                  | Unknown            | Primary tumor resection                   | Post-treatment    |
| VH-N15 | VH-P15  | 4 y     | High                  | A                  | Primary tumor resection                   | Post-treatment    |
| VH-N16 | VH-P16  | 5 m     | High                  | A                  | Primary tumor resection                   | Post-treatment    |
| VH-N17 |         | 20 m    |                       |                    | Relapse resection (Cerebellum metastasis) | Post-treatment    |
| VH-N18 | VH-P17  | 2 y     | High                  | Unknown            | Primary tumor resection                   | Post-treatment    |
| VH-N19 | VH-P18  | 2 y     | High                  | NA                 | Biopsy at diagnose                        | Pre-treatment     |
| VH-N20 |         | 3 y     |                       |                    | Relapse resection (Liver metastasis)      | Post-treatment    |
| VH-N21 | VH-P19  | 8 y     | High                  | NA                 | Resection at diagnose                     | Pre-treatment     |
| VH-N22 | VH-P20  | 11 m    | High                  | A                  | Primary tumor resection                   | Post-treatment    |
| VH-N23 | VH-P21  | 2 y     | High                  | A                  | Primary tumor resection                   | Post-treatment    |
| VH-N24 | VH-P22  | 3 m     | High                  | A                  | Biopsy at diagnose                        | Pre-treatment     |

Abbreviations: in *Age* column *y* means ‘years’ and *m* means ‘months’; in *MYCN amplification* column *NA* means ‘non-amplified’ and *A* means ‘amplified’.

## SUPPLEMENTARY METHODS

### *Human neuroblastoma samples*

Primary tumor tissue samples from 22 neuroblastoma patients enrolled at the Vall d’Hebron Hospital (Barcelona, Spain) were obtained immediately after surgery or biopsy and snap frozen in liquid nitrogen and stored at  $-80^{\circ}\text{C}$  until processing (Registered collection Ref. C.0002311). Tumors were examined by the pathologist to confirm neuroblastoma diagnosis and the presence of at least 80% of tumor tissue sample and histopathologic classification. All patients gave written informed consent.

### *Therapeutic agents for drug resistance experiments*

Therapeutic agent cis-Diammineplatinum(II) dichloride (cisplatin) was purchased from Sigma-Aldrich (St. Louis, MO, USA) and topotecan and 13-cis-retinoic acid (Isotretinoin) were purchased from Selleckchem (Houston, TX, USA).

### *Immunohistochemistry*

Formalin-fixed paraffin-embedded samples from a neuroblastoma patient from Vall d’Hebron Hospital and a healthy kidney were used for immunohistochemistry procedures, following the recommendations described in the Human Protein Atlas, using anti-DNAJC2 (ZRF1) HPA020454 antibody from Sigma-Aldrich (St. Louis, MO, USA), at 1:50 dilution. ZRF1 signal of the different cellular components found on each slide was analyzed by an expert pathologist from Pathology department of Vall d’Hebron Hospital.

### *Transcriptomic analysis*

SK-N-BE(2) cells were seeded at a density of  $2.5 \times 10^5$  cells per well in a 6-well plate and transduced with Non-Silencing Control (NSC), shZRF1 #1 or shZRF1 #3 in technical triplicates. RNA was isolated after 72 hours using the miRNeasy mini kit (Qiagen, Germantown, MA, USA). RNA quality was evaluated using Agilent Bioanalyzer 2100 Eukaryote Total RNA Pico assay (Agilent Technologies, Santa Clara, CA, USA). A total of 300 nanograms of total RNA were hybridized to Human Clariom™ S assay (Affymetrix, Santa Clara, CA, USA) arrays with the GeneChip WT Terminal Labelling and Hybridization Kit (Affymetrix). Differential gene expression analysis was performed using the Transcriptome Analysis Console version 4.0.0.25 (Thermo Fisher Scientific) and functional annotations of resulting gene lists were performed using GSEA software [1,2]. The accession number for microarray analysis reported in this paper is GSE168939.

### *Cell cycle analysis*

Transduced cells were fixed 72 h after transduction in 70% ice-cold ethanol overnight at -20 °C, at a density of 10<sup>6</sup> cells/mL. The fixed cells were washed twice with PBS and resuspended in a working solution containing 15 µg/mL propidium iodide, 1.14 mM sodium citrate, and 0.3 mg/mL RNase A in PBS at a density of 10<sup>6</sup> cells/mL. Cells were incubated at room temperature (20–25 °C) in the working solution for at least 30 min prior to analysis with a FACSCalibur flow cytometer (BD Biosciences).

### *Subcellular localization analysis*

Nuclei of neuroblastoma cell lines were isolated from cytoplasmic fraction by lysing cells in a hypotonic buffer (10 mM Hepes, 10 mM KCl pH 7.9, 1.5 mM MgCl<sub>2</sub>, protease inhibitors) and applying 50 strokes with a Potter Elvehjem homogenizer. Nuclei were pelleted (2000 xG, 15 min, 4°C) and cytoplasmic fraction (supernatant) was kept. Nuclei were lysed using RIPA buffer and passing them 5 times through a 25-gauge needle. Cell debris was pelleted and nuclear fraction was kept. A total of 30 µg of cytoplasmic or nuclear fractions were used for western blot analysis, using GAPDH (1:10000 in 5% milk; Santa Cruz Biotechnology, sc-32233) and histone H3 (1:10000 in 5% milk; Millipore, #05-928) as cytoplasmic and nuclear markers, respectively.

### REFERENCES:

1. Mootha VK, Lindgren CM, Eriksson KF, Subramanian A, Sihag S, Lehar J, Puigserver P, Carlsson E, Ridderstråle M, Laurila E, Houstis N, Daly MJ, Patterson N, Mesirov JP, Golub TR, Tamayo P, Spiegelman B, Lander ES, Hirschhorn JN, Altshuler D, Groop LC. PGC-1 $\alpha$ -responsive genes involved in oxidative phosphorylation are coordinately downregulated in human diabetes. *Nat Genet.* **2003**;34(3):267–73.
2. Subramanian A, Tamayo P, Mootha VK, Mujherjee S, Ebert BL, Gillette MA, Paulovich A, Pomeroy SL, Golub, Todd R, Lander ES, Mesirov JP. Gene set enrichment analysis: A knowledge-based approach for interpreting genome-wide expression profiles. *Proc Natl Acad Sci U S A.* **2005**;102(43):15545–50.
